# Supplementary material
Source: Springer Nature journal article supplement (https://www.springermedizin.de/resource/supplementary/12885_2011_2841_MOESM1_ESM.pdf/9462164)

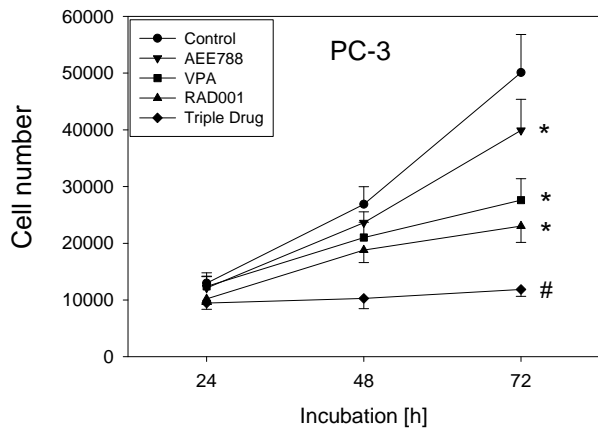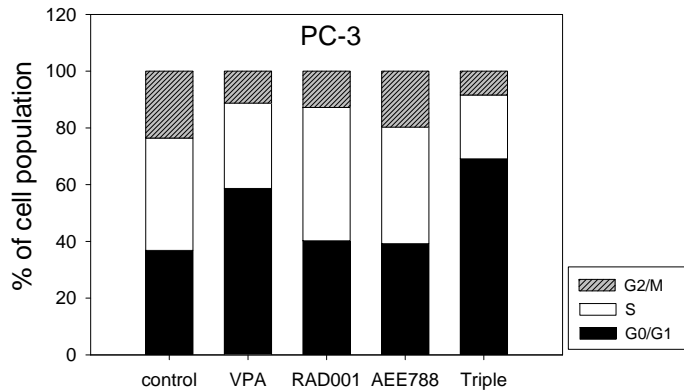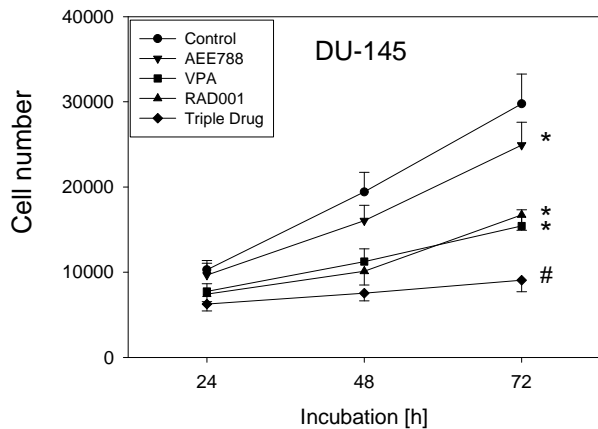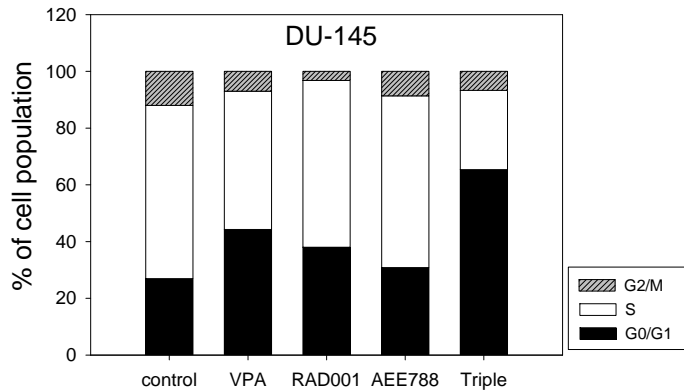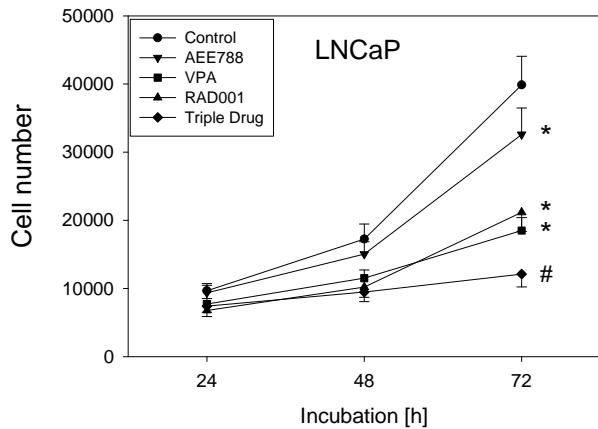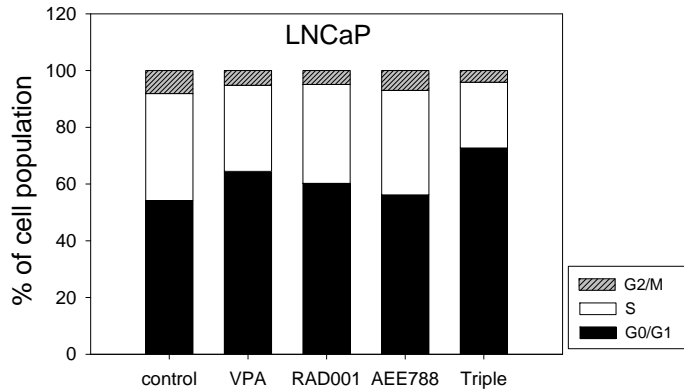

Supplement: MOESM1 [file 9462164]
